# Supplementary material for: Stage-specific roles of microbial dysbiosis and metabolic disorders in rheumatoid arthritis
Source: PubMed Central journal article supplement — Ann Rheum Dis. 2022 Aug 19;81(12):1669–77. doi: 10.1136/ard-2022-222871 (PMC9664099; doi:10.1136/ard-2022-222871), 2022-08-19
Supplement: ard-2022-222871supp003.pdf [file ard-2022-222871supp003.pdf]

## Supplementary tables

Supplementary table 1 Altered microbial species in the first stage of RA.

| Species                                        | RAS1 (n=15) |          | HC (n=27) |          | p        | q        |
|------------------------------------------------|-------------|----------|-----------|----------|----------|----------|
|                                                | Mean        | SEM      | Mean      | SEM      |          |          |
| <i>Streptococcus sanguinis</i> ↑               | 8.48E-05    | 4.02E-05 | 1.52E-06  | 1.20E-06 | 5.37E-04 | 6.43E-02 |
| <i>Streptococcus mitis oralis pneumoniae</i> ↑ | 1.63E-04    | 5.73E-05 | 9.09E-06  | 4.72E-06 | 1.21E-03 | 6.43E-02 |
| <i>Bacteroides uniformis</i> ↓                 | 9.98E-03    | 3.43E-03 | 7.83E-02  | 2.30E-02 | 1.36E-03 | 6.43E-02 |
| <i>Actinomyces graevenitzi</i> †               | 1.72E-05    | 7.22E-06 | 0.00E+00  | 0.00E+00 | 1.77E-03 | 6.43E-02 |
| <i>Streptococcus anginosus</i> ↑               | 8.26E-04    | 6.36E-04 | 0.00E+00  | 0.00E+00 | 1.77E-03 | 6.43E-02 |
| <i>Parabacteroides distasonis</i> ↓            | 1.18E-03    | 5.50E-04 | 4.97E-03  | 1.37E-03 | 1.95E-03 | 6.43E-02 |
| <i>Coprococcus comes</i> ↑                     | 1.58E-03    | 6.26E-04 | 2.96E-04  | 8.87E-05 | 3.28E-03 | 7.92E-02 |
| <i>Streptococcus infantis</i> ††               | 6.18E-05    | 2.76E-05 | 5.93E-06  | 5.63E-06 | 3.43E-03 | 7.92E-02 |
| <i>Holdemania filiformis</i> ↑                 | 3.45E-05    | 2.21E-05 | 3.23E-06  | 3.23E-06 | 3.60E-03 | 7.92E-02 |
| <i>Bacteroides ovatus</i> ↓†                   | 1.22E-03    | 4.45E-04 | 1.60E-02  | 8.91E-03 | 4.21E-03 | 8.34E-02 |
| <i>Streptococcus cristatus</i> ↑               | 6.46E-06    | 3.15E-06 | 0.00E+00  | 0.00E+00 | 5.83E-03 | 9.62E-02 |
| <i>Streptococcus vestibularis</i> ↑            | 7.11E-05    | 4.24E-05 | 0.00E+00  | 0.00E+00 | 5.83E-03 | 9.62E-02 |
| <i>Streptococcus gordonii</i> ↑                | 5.69E-05    | 2.36E-05 | 1.81E-06  | 1.81E-06 | 7.49E-03 | 1.14E-01 |
| <i>Actinomyces odontolyticus</i> ↑             | 2.71E-05    | 1.75E-05 | 0.00E+00  | 0.00E+00 | 1.87E-02 | 1.95E-01 |
| <i>Atopobium parvulum</i> ††                   | 1.58E-05    | 8.60E-06 | 0.00E+00  | 0.00E+00 | 1.87E-02 | 1.95E-01 |
| <i>Prevotella stercorea</i> ↑                  | 3.84E-04    | 2.38E-04 | 0.00E+00  | 0.00E+00 | 1.87E-02 | 1.95E-01 |
| <i>Enterococcus faecium</i> ↑                  | 4.24E-05    | 2.58E-05 | 0.00E+00  | 0.00E+00 | 1.87E-02 | 1.95E-01 |
| <i>Weissella confusa</i> ↑                     | 6.79E-05    | 4.60E-05 | 0.00E+00  | 0.00E+00 | 1.87E-02 | 1.95E-01 |
| <i>Solobacterium moorei</i> ↑                  | 6.03E-05    | 3.67E-05 | 0.00E+00  | 0.00E+00 | 1.87E-02 | 1.95E-01 |
| <i>Bacteroides cellulosilyticus</i> ↓          | 5.37E-04    | 3.89E-04 | 7.73E-03  | 4.77E-03 | 2.33E-02 | 2.16E-01 |
| <i>Parasutterella excrementihominis</i> †      | 2.80E-04    | 2.62E-04 | 1.47E-03  | 6.70E-04 | 2.44E-02 | 2.16E-01 |
| <i>Granulicatella adiacens</i> ††              | 3.08E-05    | 1.94E-05 | 6.59E-07  | 6.59E-07 | 2.51E-02 | 2.16E-01 |
| <i>Turicibacter sanguinis</i> ††               | 8.02E-05    | 4.57E-05 | 1.11E-06  | 1.11E-06 | 2.51E-02 | 2.16E-01 |
| <i>Prevotella copri</i> †                      | 1.46E-01    | 5.86E-02 | 1.04E-02  | 8.24E-03 | 3.46E-02 | 2.75E-01 |
| <i>Streptococcus parasanguinis</i> ↑           | 9.14E-04    | 5.85E-04 | 3.92E-05  | 2.56E-05 | 3.47E-02 | 2.75E-01 |
| <i>Dorea formicigenerans</i> ↑                 | 8.21E-04    | 2.26E-04 | 3.85E-04  | 9.07E-05 | 3.81E-02 | 2.82E-01 |
| <i>Klebsiella pneumoniae</i> ↑                 | 1.26E-02    | 1.02E-02 | 1.14E-03  | 8.56E-04 | 3.84E-02 | 2.82E-01 |
| <i>Coprobacter fastidiosus</i> ↓               | 8.14E-05    | 7.79E-05 | 2.14E-03  | 1.41E-03 | 4.10E-02 | 2.90E-01 |
| <i>Collinsella aerofaciens</i> ††              | 2.00E-03    | 9.48E-04 | 3.56E-04  | 1.73E-04 | 4.34E-02 | 2.96E-01 |

p values produced by Mann-Whitney-Wilcoxon test are displayed. q values are calculated using Benjamini and Hochberg corrections. Only results with p<0.05 are displayed here.

↑↓Species that are increased/decreased in RAS1 compared to HC.

†Species that are altered exclusively in RAS1, with p<0.05 only observed in comparisons between RAS1 and HC.

RAS1, individuals in the first stage of rheumatoid arthritis; HC, healthy controls; SEM, standard error of the mean.

**Supplementary table 2** Altered microbial species in the second stage of RA.

| Species                               | RAS2 (n=21) |          | HC (n=27) |          | p        | q        |
|---------------------------------------|-------------|----------|-----------|----------|----------|----------|
|                                       | Mean        | SEM      | Mean      | SEM      |          |          |
| <i>Escherichia coli</i> †             | 5.59E-02    | 2.37E-02 | 4.74E-03  | 1.97E-03 | 1.27E-03 | 1.31E-01 |
| <i>Streptococcus anginosus</i> †      | 1.45E-04    | 7.82E-05 | 0.00E+00  | 0.00E+00 | 1.46E-03 | 1.31E-01 |
| <i>Clostridium nexile</i> †           | 8.02E-04    | 2.26E-04 | 5.64E-05  | 3.86E-05 | 1.89E-03 | 1.31E-01 |
| <i>Clostridium hathewayi</i> †        | 6.77E-04    | 5.60E-04 | 9.63E-07  | 6.71E-07 | 2.53E-03 | 1.31E-01 |
| <i>Bacteroides uniformis</i> ↓        | 1.81E-02    | 5.88E-03 | 7.83E-02  | 2.30E-02 | 5.35E-03 | 2.13E-01 |
| <i>Klebsiella pneumoniae</i> †        | 1.99E-02    | 1.80E-02 | 1.14E-03  | 8.56E-04 | 6.30E-03 | 2.13E-01 |
| <i>Bifidobacterium dentium</i> †      | 4.91E-04    | 2.37E-04 | 3.70E-05  | 3.70E-05 | 7.16E-03 | 2.13E-01 |
| <i>Blautia gnavus</i> †               | 5.71E-03    | 2.24E-03 | 1.22E-03  | 7.29E-04 | 8.76E-03 | 2.28E-01 |
| <i>Bacteroides salyersiae</i> ↓       | 5.63E-05    | 4.28E-05 | 2.21E-03  | 1.08E-03 | 1.23E-02 | 2.80E-01 |
| <i>Prevotella copri</i> †             | 8.60E-02    | 3.53E-02 | 1.04E-02  | 8.24E-03 | 1.35E-02 | 2.80E-01 |
| <i>Holdemania filiformis</i> †        | 1.15E-04    | 6.21E-05 | 3.23E-06  | 3.23E-06 | 1.62E-02 | 2.83E-01 |
| <i>Blautia torques</i> †              | 5.16E-03    | 1.48E-03 | 1.46E-03  | 3.78E-04 | 1.63E-02 | 2.83E-01 |
| <i>Clostridium clostridioforme</i> †† | 3.94E-04    | 2.77E-04 | 1.12E-05  | 1.12E-05 | 1.95E-02 | 2.83E-01 |
| <i>Scardovia wiggisiae</i> †          | 1.35E-05    | 1.13E-05 | 0.00E+00  | 0.00E+00 | 2.04E-02 | 2.83E-01 |
| <i>Weissella confusa</i> †            | 3.25E-04    | 3.19E-04 | 0.00E+00  | 0.00E+00 | 2.04E-02 | 2.83E-01 |
| <i>Coprobacter fastidiosus</i> ↓      | 1.25E-04    | 7.51E-05 | 2.14E-03  | 1.41E-03 | 2.38E-02 | 3.09E-01 |
| <i>Bacteroides coprocola</i> ↓†       | 8.26E-03    | 4.20E-03 | 7.47E-02  | 2.01E-02 | 3.57E-02 | 3.67E-01 |
| <i>Streptococcus parasanguinis</i> †  | 4.92E-04    | 3.40E-04 | 3.92E-05  | 2.56E-05 | 3.63E-02 | 3.67E-01 |
| <i>Eubacterium ramulus</i> †          | 9.24E-04    | 5.07E-04 | 7.81E-05  | 2.84E-05 | 3.64E-02 | 3.67E-01 |
| <i>Parabacteroides johnsonii</i> ↓†   | 2.31E-06    | 2.31E-06 | 4.67E-04  | 2.35E-04 | 4.37E-02 | 3.67E-01 |
| <i>Paraprevotella clara</i> ↓         | 1.16E-03    | 6.88E-04 | 3.77E-03  | 1.72E-03 | 4.56E-02 | 3.67E-01 |
| <i>Akkermansia muciniphila</i> ↓      | 1.96E-03    | 1.66E-03 | 3.43E-03  | 1.33E-03 | 4.61E-02 | 3.67E-01 |
| <i>Actinomyces odontolyticus</i> †    | 1.03E-05    | 9.64E-06 | 0.00E+00  | 0.00E+00 | 4.76E-02 | 3.67E-01 |
| <i>Scardovia inopinata</i> ††         | 5.68E-06    | 3.95E-06 | 0.00E+00  | 0.00E+00 | 4.76E-02 | 3.67E-01 |
| <i>Porphyromonas somerae</i> ††       | 1.26E-05    | 9.64E-06 | 0.00E+00  | 0.00E+00 | 4.76E-02 | 3.67E-01 |
| <i>Lactobacillus salivarius</i> †     | 1.29E-04    | 1.12E-04 | 0.00E+00  | 0.00E+00 | 4.76E-02 | 3.67E-01 |
| <i>Streptococcus cristatus</i> †      | 1.66E-05    | 1.28E-05 | 0.00E+00  | 0.00E+00 | 4.76E-02 | 3.67E-01 |

p values produced by Mann-Whitney-Wilcoxon test are displayed. q values are calculated using Benjamini and Hochberg corrections. Only results with p<0.05 are displayed here.

†↓Species that are increased/decreased in RAS2 compared to HC.

††Species that are altered exclusively in RAS2, with p<0.05 only observed in comparisons between RAS2 and HC.

RAS2, individuals in the second stage of rheumatoid arthritis; HC, healthy controls; SEM, standard error of the mean.

**Supplementary table 3** Altered microbial species in the third stage of RA.

| Species                              | RAS3 (n=18) |          | HC (n=27) |          | p        | q        |
|--------------------------------------|-------------|----------|-----------|----------|----------|----------|
|                                      | Mean        | SEM      | Mean      | SEM      |          |          |
| <i>Lactobacillus salivarius</i> †    | 1.14E-03    | 8.44E-04 | 0.00E+00  | 0.00E+00 | 5.56E-04 | 5.45E-02 |
| <i>Streptococcus anginosus</i> †     | 1.81E-04    | 7.46E-05 | 0.00E+00  | 0.00E+00 | 5.56E-04 | 5.45E-02 |
| <i>Streptococcus parasanguinis</i> † | 6.52E-04    | 2.07E-04 | 3.92E-05  | 2.56E-05 | 2.04E-03 | 1.33E-01 |
| <i>Bifidobacterium dentium</i> †     | 4.16E-04    | 2.47E-04 | 3.70E-05  | 3.70E-05 | 3.70E-03 | 1.39E-01 |
| <i>Parabacteroides distasonis</i>    | 2.07E-03    | 9.12E-04 | 4.97E-03  | 1.37E-03 | 4.85E-03 | 1.39E-01 |
| <i>Dorea formicigenerans</i> †       | 1.74E-03    | 4.57E-04 | 3.85E-04  | 9.07E-05 | 4.85E-03 | 1.39E-01 |
| <i>Veillonella atypica</i> †         | 4.93E-04    | 2.15E-04 | 6.54E-05  | 3.46E-05 | 5.57E-03 | 1.39E-01 |
| <i>Clostridium hathewayi</i> †       | 3.46E-04    | 2.89E-04 | 9.63E-07  | 6.71E-07 | 5.92E-03 | 1.39E-01 |
| <i>Bacteroides uniformis</i> ↓       | 1.65E-02    | 6.81E-03 | 7.83E-02  | 2.30E-02 | 7.20E-03 | 1.39E-01 |
| <i>Escherichia coli</i> †            | 6.34E-02    | 2.08E-02 | 4.74E-03  | 1.97E-03 | 9.70E-03 | 1.39E-01 |
| <i>Klebsiella pneumoniae</i> †       | 7.06E-03    | 3.31E-03 | 1.14E-03  | 8.56E-04 | 1.09E-02 | 1.39E-01 |
| <i>Eubacterium ramulus</i> †         | 4.67E-04    | 1.48E-04 | 7.81E-05  | 2.84E-05 | 1.17E-02 | 1.39E-01 |
| <i>Actinomyces odontolyticus</i> †   | 2.69E-05    | 2.31E-05 | 0.00E+00  | 0.00E+00 | 1.21E-02 | 1.39E-01 |
| <i>Parascardovia denticolens</i> ††  | 1.25E-05    | 8.26E-06 | 0.00E+00  | 0.00E+00 | 1.21E-02 | 1.39E-01 |
| <i>Scardovia wiggsiae</i> †          | 6.48E-05    | 4.22E-05 | 0.00E+00  | 0.00E+00 | 1.21E-02 | 1.39E-01 |
| <i>Lactobacillus gasseri</i> ††      | 1.13E-04    | 6.15E-05 | 0.00E+00  | 0.00E+00 | 1.21E-02 | 1.39E-01 |
| <i>Weissella confusa</i> †           | 3.35E-05    | 2.35E-05 | 0.00E+00  | 0.00E+00 | 1.21E-02 | 1.39E-01 |
| <i>Ruminococcus 39BFAA</i> †         | 3.86E-03    | 1.36E-03 | 3.62E-04  | 2.07E-04 | 1.62E-02 | 1.73E-01 |
| <i>Blautia torques</i> †             | 4.26E-03    | 1.12E-03 | 1.46E-03  | 3.78E-04 | 1.70E-02 | 1.73E-01 |
| <i>Streptococcus gordonii</i> †      | 6.55E-05    | 2.88E-05 | 1.81E-06  | 1.81E-06 | 1.77E-02 | 1.73E-01 |
| <i>Clostridium nexile</i> †          | 1.06E-03    | 9.42E-04 | 5.64E-05  | 3.86E-05 | 1.88E-02 | 1.75E-01 |
| <i>Streptococcus pneumoniae</i> †    | 4.71E-05    | 1.69E-05 | 9.09E-06  | 4.72E-06 | 2.11E-02 | 1.86E-01 |
| <i>Holdemania filiformis</i> †       | 3.41E-05    | 1.64E-05 | 3.23E-06  | 3.23E-06 | 2.18E-02 | 1.86E-01 |
| <i>Veillonella parvula</i> ††        | 1.49E-03    | 6.11E-04 | 2.66E-04  | 8.53E-05 | 2.73E-02 | 2.17E-01 |
| <i>Enterococcus faecium</i> †        | 1.01E-03    | 9.96E-04 | 0.00E+00  | 0.00E+00 | 3.21E-02 | 2.17E-01 |
| <i>Lactobacillus crispatus</i> ††    | 4.82E-05    | 2.97E-05 | 0.00E+00  | 0.00E+00 | 3.21E-02 | 2.17E-01 |
| <i>Lactobacillus oris</i> ††         | 3.00E-05    | 1.84E-05 | 0.00E+00  | 0.00E+00 | 3.21E-02 | 2.17E-01 |
| <i>Streptococcus mutans</i> ††       | 3.72E-05    | 2.02E-05 | 0.00E+00  | 0.00E+00 | 3.21E-02 | 2.17E-01 |
| <i>Solobacterium moorei</i> †        | 1.57E-05    | 1.12E-05 | 0.00E+00  | 0.00E+00 | 3.21E-02 | 2.17E-01 |
| <i>Streptococcus salivarius</i> †    | 3.50E-03    | 1.51E-03 | 4.31E-04  | 1.64E-04 | 3.47E-02 | 2.23E-01 |
| <i>Paraprevotella clara</i> ↓        | 4.08E-04    | 1.75E-04 | 3.77E-03  | 1.72E-03 | 3.66E-02 | 2.23E-01 |
| <i>Dorea longicatena</i> ††          | 3.21E-03    | 1.61E-03 | 9.42E-04  | 3.77E-04 | 3.74E-02 | 2.23E-01 |
| <i>Enterobacter cloacae</i> ††       | 4.51E-03    | 3.67E-03 | 4.13E-03  | 3.98E-03 | 3.75E-02 | 2.23E-01 |
| <i>Parabacteroides merdae</i> ↓      | 3.07E-03    | 1.02E-03 | 7.83E-03  | 1.79E-03 | 4.67E-02 | 2.69E-01 |

p values produced by Mann-Whitney-Wilcoxon test are displayed. q values are calculated using Benjamini and Hochberg corrections. Only results with p<0.05 are displayed here.

†↓Species that are increased/decreased in RAS3 compared to HC.

††Species that are altered exclusively in RAS3, with p<0.05 only observed in comparisons between RAS3 and HC.

RAS3, individuals in the third stage of rheumatoid arthritis; HC, healthy controls; SEM, standard error of the mean.

**Supplementary table 4** Altered microbial species in the fourth stage of RA.

| Species                               | RAS4 (n=22) |          | HC (n=27) |          | p        | q        |
|---------------------------------------|-------------|----------|-----------|----------|----------|----------|
|                                       | Mean        | SEM      | Mean      | SEM      |          |          |
| <i>Actinomyces odontolyticus</i> †    | 2.46E-05    | 1.10E-05 | 0.00E+00  | 0.00E+00 | 7.88E-04 | 6.34E-02 |
| <i>Streptococcus anginosus</i> †      | 1.86E-04    | 1.36E-04 | 0.00E+00  | 0.00E+00 | 7.88E-04 | 6.34E-02 |
| <i>Bifidobacterium dentium</i> †      | 5.48E-04    | 3.90E-04 | 3.70E-05  | 3.70E-05 | 9.15E-04 | 6.34E-02 |
| <i>Veillonella atypica</i> †          | 3.71E-04    | 1.10E-04 | 6.54E-05  | 3.46E-05 | 1.25E-03 | 6.51E-02 |
| <i>Streptococcus sanguinis</i> †      | 4.20E-05    | 1.47E-05 | 1.52E-06  | 1.20E-06 | 1.60E-03 | 6.52E-02 |
| <i>Streptococcus vestibularis</i> †   | 6.59E-04    | 6.19E-04 | 0.00E+00  | 0.00E+00 | 1.90E-03 | 6.52E-02 |
| <i>Clostridium citroniae</i> †        | 8.92E-05    | 4.80E-05 | 4.85E-06  | 3.50E-06 | 2.29E-03 | 6.52E-02 |
| <i>Streptococcus parasanguinis</i> †  | 6.04E-04    | 3.99E-04 | 3.92E-05  | 2.56E-05 | 2.51E-03 | 6.52E-02 |
| <i>Clostridium hathewayi</i> †        | 2.00E-03    | 1.92E-03 | 9.63E-07  | 6.71E-07 | 2.96E-03 | 6.85E-02 |
| <i>Streptococcus gordonii</i> †       | 4.55E-05    | 2.40E-05 | 1.81E-06  | 1.81E-06 | 3.37E-03 | 7.01E-02 |
| <i>Bacteroides uniformis</i> ↓        | 3.06E-02    | 1.54E-02 | 7.83E-02  | 2.30E-02 | 5.71E-03 | 1.08E-01 |
| <i>Bacteroides cellulosilyticus</i> ↓ | 3.11E-04    | 2.67E-04 | 7.73E-03  | 4.77E-03 | 6.24E-03 | 1.08E-01 |
| <i>Parabacteroides distasonis</i> ↓   | 3.27E-03    | 1.94E-03 | 4.97E-03  | 1.37E-03 | 1.04E-02 | 1.54E-01 |
| <i>Enterococcus faecium</i> †         | 3.35E-03    | 2.82E-03 | 0.00E+00  | 0.00E+00 | 1.04E-02 | 1.54E-01 |
| <i>Akkermansia muciniphila</i> ↓      | 2.13E-03    | 1.66E-03 | 3.43E-03  | 1.33E-03 | 1.67E-02 | 1.96E-01 |
| <i>Ruminococcus 39BFAA</i> †          | 3.22E-03    | 1.13E-03 | 3.62E-04  | 2.07E-04 | 1.73E-02 | 1.96E-01 |
| <i>Eggerthella lenta</i> ††           | 1.11E-04    | 7.23E-05 | 1.56E-06  | 1.56E-06 | 1.82E-02 | 1.96E-01 |
| <i>Bacteroides salyersiae</i>         | 7.13E-04    | 6.58E-04 | 2.21E-03  | 1.08E-03 | 1.93E-02 | 1.96E-01 |
| <i>Bacteroides faecis</i> †           | 1.57E-04    | 1.02E-04 | 3.79E-03  | 1.47E-03 | 1.95E-02 | 1.96E-01 |
| <i>Streptococcus salivarius</i> †     | 7.74E-03    | 6.31E-03 | 4.31E-04  | 1.64E-04 | 2.15E-02 | 1.96E-01 |
| <i>Coprobacter fastidiosus</i> ↓      | 1.72E-04    | 1.23E-04 | 2.14E-03  | 1.41E-03 | 2.24E-02 | 1.96E-01 |
| <i>Bifidobacterium longum</i> ††      | 1.05E-02    | 5.10E-03 | 1.01E-03  | 3.23E-04 | 2.25E-02 | 1.96E-01 |
| <i>Actinomyces graevenitzi</i> †      | 1.70E-05    | 9.92E-06 | 0.00E+00  | 0.00E+00 | 2.35E-02 | 1.96E-01 |
| <i>Lactococcus garvieae</i> ††        | 7.46E-05    | 5.37E-05 | 0.00E+00  | 0.00E+00 | 2.35E-02 | 1.96E-01 |
| <i>Solobacterium moorei</i> †         | 1.88E-05    | 1.22E-05 | 0.00E+00  | 0.00E+00 | 2.35E-02 | 1.96E-01 |
| <i>Bacteroides caccae</i> †           | 3.06E-03    | 1.03E-03 | 1.02E-02  | 3.41E-03 | 3.30E-02 | 2.64E-01 |
| <i>Parabacteroides merdae</i> ↓       | 4.55E-03    | 1.99E-03 | 7.83E-03  | 1.79E-03 | 3.85E-02 | 2.89E-01 |
| <i>Citrobacter freundii</i> †         | 1.70E-03    | 1.63E-03 | 1.74E-06  | 1.74E-06 | 3.89E-02 | 2.89E-01 |

p values produced by Mann-Whitney-Wilcoxon test are displayed. q values are calculated using Benjamini and Hochberg corrections. Only results with p<0.05 are displayed here.

†↓Species that are increased/decreased in RAS4 compared to HC.

††Species that are altered exclusively in RAS4, with p<0.05 only observed in comparisons between RAS4 and HC.

RAS4, individuals in the fourth stage of rheumatoid arthritis; HC, healthy controls; SEM, standard error of the mean.

**Supplementary table 5** Altered microbial species in OA.

| Species                               | OA (n=19) |          | HC (n=27) |          | p        | q        |
|---------------------------------------|-----------|----------|-----------|----------|----------|----------|
|                                       | Mean      | SEM      | Mean      | SEM      |          |          |
| <i>Coprococcus catus</i> ††           | 2.17E-03  | 7.19E-04 | 3.24E-04  | 1.43E-04 | 6.27E-05 | 1.22E-02 |
| <i>Blautia torques</i> †              | 8.49E-03  | 2.79E-03 | 1.46E-03  | 3.78E-04 | 3.72E-04 | 3.05E-02 |
| <i>Bacteroides cellulosilyticus</i> ↓ | 6.27E-05  | 6.01E-05 | 7.73E-03  | 4.77E-03 | 4.72E-04 | 3.05E-02 |
| <i>Enterococcus faecium</i> †         | 3.80E-04  | 1.81E-04 | 0.00E+00  | 0.00E+00 | 7.94E-04 | 3.85E-02 |
| <i>Coprococcus comes</i> †            | 1.39E-03  | 3.27E-04 | 2.96E-04  | 8.87E-05 | 1.85E-03 | 6.96E-02 |
| <i>Streptococcus anginosus</i> †      | 1.29E-04  | 5.94E-05 | 0.00E+00  | 0.00E+00 | 2.15E-03 | 6.96E-02 |
| <i>Holdemania filiformis</i> †        | 7.62E-05  | 3.72E-05 | 3.23E-06  | 3.23E-06 | 4.10E-03 | 1.14E-01 |
| <i>Blautia obeum</i> ††               | 2.91E-03  | 7.54E-04 | 1.26E-03  | 4.87E-04 | 4.77E-03 | 1.16E-01 |
| <i>Ruminococcus 39BFAA</i> †          | 4.97E-03  | 1.90E-03 | 3.62E-04  | 2.07E-04 | 8.68E-03 | 1.75E-01 |
| <i>Parabacteroides distasonis</i> ↓   | 3.03E-03  | 1.66E-03 | 4.97E-03  | 1.37E-03 | 9.01E-03 | 1.75E-01 |
| <i>Actinomyces odontolyticus</i> †    | 1.55E-05  | 8.27E-06 | 0.00E+00  | 0.00E+00 | 1.46E-02 | 1.90E-01 |
| <i>Lactobacillus salivarius</i> †     | 8.90E-04  | 4.79E-04 | 0.00E+00  | 0.00E+00 | 1.46E-02 | 1.90E-01 |
| <i>Streptococcus vestibularis</i> †   | 1.62E-03  | 1.58E-03 | 0.00E+00  | 0.00E+00 | 1.46E-02 | 1.90E-01 |
| <i>Solobacterium moorei</i> †         | 5.75E-06  | 3.90E-06 | 0.00E+00  | 0.00E+00 | 1.46E-02 | 1.90E-01 |
| <i>Bifidobacterium dentium</i> †      | 5.74E-05  | 2.29E-05 | 3.70E-05  | 3.70E-05 | 1.52E-02 | 1.90E-01 |
| <i>Clostridium citroniae</i> †        | 3.42E-05  | 1.68E-05 | 4.85E-06  | 3.50E-06 | 1.57E-02 | 1.90E-01 |
| <i>Prevotella copri</i> †             | 9.27E-02  | 3.36E-02 | 1.04E-02  | 8.24E-03 | 1.84E-02 | 2.10E-01 |
| <i>Streptococcus gordonii</i> †       | 6.14E-05  | 3.05E-05 | 1.81E-06  | 1.81E-06 | 2.22E-02 | 2.27E-01 |
| <i>Citrobacter freundii</i> †         | 4.04E-04  | 2.63E-04 | 1.74E-06  | 1.74E-06 | 2.22E-02 | 2.27E-01 |
| <i>Paraprevotella clara</i> ↓         | 6.19E-04  | 3.20E-04 | 3.77E-03  | 1.72E-03 | 2.66E-02 | 2.58E-01 |
| <i>Streptococcus parasanguinis</i> †  | 9.49E-04  | 4.41E-04 | 3.92E-05  | 2.56E-05 | 2.81E-02 | 2.60E-01 |
| <i>Blautia gnavus</i> †               | 4.17E-03  | 2.86E-03 | 1.22E-03  | 7.29E-04 | 3.24E-02 | 2.86E-01 |
| <i>Escherichia coli</i> †             | 8.35E-02  | 4.00E-02 | 4.74E-03  | 1.97E-03 | 3.58E-02 | 2.88E-01 |
| <i>Weissella confusa</i> †            | 1.07E-04  | 8.06E-05 | 0.00E+00  | 0.00E+00 | 3.71E-02 | 2.88E-01 |
| <i>Clostridium perfringens</i> ††     | 1.18E-04  | 7.26E-05 | 0.00E+00  | 0.00E+00 | 3.71E-02 | 2.88E-01 |
| <i>Dialister invisus</i> ††           | 2.22E-03  | 1.31E-03 | 8.17E-04  | 7.28E-04 | 4.10E-02 | 3.06E-01 |

p values produced by Mann-Whitney-Wilcoxon test are displayed. q values are calculated using Benjamini and Hochberg corrections. Only results with p<0.05 are displayed here.

†↓Species that are increased/decreased in OA compared to HC.

†Species that are altered exclusively in OA, with p<0.05 only observed in comparisons between the OA and HC.

OA, individuals in the first stage of osteoarthritis; HC, healthy controls; SEM, standard error of the mean.

**Supplementary table 6** Correlations of KEGG modules with rheumatoid factor and plasma cytokines.

|                       | M00550                     |                           | M00879                    |                           | M00545                         |                           |
|-----------------------|----------------------------|---------------------------|---------------------------|---------------------------|--------------------------------|---------------------------|
|                       | p (p <sub>partial</sub> )  | q (q <sub>partial</sub> ) | p (p <sub>partial</sub> ) | q (q <sub>partial</sub> ) | p (p <sub>partial</sub> )      | q (q <sub>partial</sub> ) |
| RF, IU/mL             | 0.217<br>(0.480)           | 0.547<br>(0.773)          | 0.00135**<br>(0.00601**)  | 0.0472*<br>(0.0516*)      | 0.00013***<br>(0.00319**)      | 0.0118*<br>(0.0470*)      |
| IL-1 $\beta$ , pg/mL  | 0.000544***<br>(0.00278**) | 0.0370*<br>(0.0432*)      | 0.0126*<br>(0.0252*)      | 0.196<br>(0.294)          | 0.0000287***<br>(0.000335***)  | 0.00391*<br>(0.0325*)     |
| IL-4, pg/mL           | 0.00420**<br>(0.0640)      | 0.0967*<br>(0.470)        | 0.243<br>(0.925)          | 0.55<br>(0.961)           | 0.00177**<br>(0.199)           | 0.0607*<br>(0.669)        |
| IL-8, pg/mL           | 0.000745***<br>(0.00400**) | 0.0707*<br>(0.0851*)      | 0.0201*<br>(0.0337*)      | 0.297<br>(0.456)          | 0.000246***<br>(0.00347**)     | 0.0669*<br>(0.0751*)      |
| IFN- $\gamma$ , pg/mL | 0.00313**<br>(0.0366*)     | 0.106<br>(0.444)          | 0.076<br>(0.289)          | 0.519<br>(0.678)          | 0.000392***<br>(0.0325*)       | 0.0356*<br>(0.0946*)      |
| IL-10, pg/mL          | 0.00155**<br>(0.00642**)   | 0.105<br>(0.218)          | 0.0162*<br>(0.0330*)      | 0.246<br>(0.364)          | 0.000041***<br>(0.000373***)   | 0.00557*<br>(0.0464*)     |
| IL-12p70, pg/mL       | 0.00347**<br>(0.0490*)     | 0.0931*<br>(0.478)        | 0.172<br>(0.609)          | 0.458<br>(0.837)          | 0.00261**<br>(0.176)           | 0.0888*<br>(0.543)        |
| IL-13, pg/mL          | 0.0858<br>(0.262)          | 0.421<br>(0.560)          | 0.0190*<br>(0.0139*)      | 0.215<br>(0.165)          | 0.0000163***<br>(0.0000639***) | 0.00441*<br>(0.0110*)     |
| IL-17, pg/mL          | 0.104<br>(0.600)           | 0.421<br>(0.820)          | 0.829<br>(0.493)          | 0.915<br>(0.810)          | 0.777<br>(0.111)               | 0.895<br>(0.451)          |
| IL-2, pg/mL           | 0.000937***<br>(0.00677**) | 0.0637*<br>(0.0501*)      | 0.0146*<br>(0.0264*)      | 0.233<br>(0.362)          | 0.000074***<br>(0.00133**)     | 0.0101*<br>(0.0720*)      |
| IL-6, pg/mL           | 0.00112**<br>(0.0103*)     | 0.0611*<br>(0.0716*)      | 0.125<br>(0.358)          | 0.467<br>(0.738)          | 0.00612**<br>(0.204)           | 0.151<br>(0.587)          |
| TNF- $\alpha$ , pg/mL | 0.000659***<br>(0.00600**) | 0.0504*<br>(0.0632*)      | 0.0318*<br>(0.0855)       | 0.360<br>(0.516)          | 0.0000697***<br>(0.00182**)    | 0.00947*<br>(0.0876*)     |

\*p<0.05 (p<sub>partial</sub><0.05), \*\*p<0.01 (p<sub>partial</sub><0.01), \*\*\*p<0.001 (p<sub>partial</sub><0.001), Mann-Whitney-Wilcoxon test; \*q<0.1 (q<sub>partial</sub><0.1), Benjamini and Hochberg corrections. Comparisons of SCCs were used for calculating p and q, while comparisons of partial SCCs with age and gender adjusted were used for calculating p<sub>partial</sub> and q<sub>partial</sub>.

KEGG, Kyoto Encyclopedia of Genes and Genomes; RF, rheumatoid factor; IL, interleukin; TNF, tumour necrosis factor; IFN, Interferon; M00550, ascorbate degradation; M00879, arginine succinyltransferase pathway; M00545, trans-cinnamate degradation.

**Supplementary table 7** The overlap of genera from gut metagenomic data and synovial fluid 16S data.

|                        | Gut metagenome |            | Synovial fluid 16S data |            |
|------------------------|----------------|------------|-------------------------|------------|
|                        | Mean           | S.E.M.     | Mean                    | S.E.M.     |
| <i>Abiotrophia</i>     | 6.45E-07       | 5.62E-07   | 5.46E-05                | 5.61E-06   |
| <i>Acidaminococcus</i> | 3.76E-05       | 2.32E-05   | 3.23E-06                | 8.82E-07   |
| <i>Acinetobacter</i>   | 2.63E-06       | 2.54E-06   | 0.001319                | 0.00025738 |
| <i>Actinobacillus</i>  | 1.22E-06       | 7.32E-07   | 0.00039202              | 7.36E-05   |
| <i>Actinomyces</i>     | 4.10E-05       | 1.70E-05   | 0.00197494              | 0.0001988  |
| <i>Adlercreutzia</i>   | 0.00094741     | 0.0003535  | 6.59E-06                | 1.23E-06   |
| <i>Aerococcus</i>      | 7.06E-07       | 4.66E-07   | 2.93E-05                | 1.04E-05   |
| <i>Aggregatibacter</i> | 8.31E-06       | 5.13E-06   | 0.00108706              | 0.00014183 |
| <i>Akkermansia</i>     | 0.00268821     | 0.00066918 | 0.00043613              | 0.00010519 |
| <i>Anaerococcus</i>    | 8.54E-07       | 7.75E-07   | 1.58E-05                | 3.75E-06   |
| <i>Anaerostipes</i>    | 0.00026032     | 6.53E-05   | 0.00034683              | 6.36E-05   |
| <i>Anaerotruncus</i>   | 4.99E-05       | 1.80E-05   | 5.39E-06                | 2.67E-06   |
| <i>Atopobium</i>       | 5.53E-06       | 2.23E-06   | 0.00042272              | 3.19E-05   |
| <i>Bacillus</i>        | 6.64E-07       | 6.36E-07   | 1.84E-05                | 3.17E-06   |
| <i>Bacteroides</i>     | 0.29013943     | 0.02109775 | 0.00840018              | 0.0013154  |
| <i>Bifidobacterium</i> | 0.01829813     | 0.0065187  | 0.00315388              | 0.00064278 |
| <i>Bilophila</i>       | 0.00113221     | 0.0001444  | 0.00034651              | 6.52E-05   |
| <i>Blautia</i>         | 0.01098432     | 0.001956   | 0.00526647              | 0.00099596 |
| <i>Brachybacterium</i> | 5.13E-08       | 5.13E-08   | 3.21E-05                | 5.29E-06   |
| <i>Brevundimonas</i>   | 1.44E-07       | 1.44E-07   | 1.59E-06                | 4.31E-07   |
| <i>Bulleidia</i>       | 6.85E-07       | 5.30E-07   | 0.00020587              | 1.40E-05   |
| <i>Burkholderia</i>    | 1.36E-06       | 1.36E-06   | 3.73E-05                | 5.89E-06   |
| <i>Butyricimonas</i>   | 7.75E-07       | 4.08E-07   | 1.29E-05                | 3.68E-06   |
| <i>Butyrivibrio</i>    | 0.00666776     | 0.00289482 | 2.12E-05                | 2.49E-06   |
| <i>Campylobacter</i>   | 6.30E-06       | 2.99E-06   | 0.00028281              | 5.46E-05   |
| <i>Catenibacterium</i> | 0.0002607      | 0.00013758 | 8.73E-06                | 2.88E-06   |
| <i>Caulobacter</i>     | 8.14E-06       | 4.54E-06   | 4.71E-06                | 3.38E-06   |
| <i>Cetobacterium</i>   | 4.80E-06       | 4.47E-06   | 7.04E-07                | 3.60E-07   |
| <i>Citrobacter</i>     | 0.00078944     | 0.00046747 | 3.70E-05                | 3.02E-06   |
| <i>Clostridium</i>     | 0.00343966     | 0.00085761 | 0.00035388              | 6.61E-05   |
| <i>Collinsella</i>     | 0.00203712     | 0.00056893 | 0.00100336              | 0.00025988 |
| <i>Coprobacillus</i>   | 0.00029756     | 0.00010014 | 8.17E-05                | 3.65E-05   |
| <i>Coprococcus</i>     | 0.01041403     | 0.0024852  | 0.00244928              | 0.00040413 |
| <i>Corynebacterium</i> | 6.73E-06       | 4.83E-06   | 0.00059499              | 0.00010074 |
| <i>Deinococcus</i>     | 6.97E-07       | 6.97E-07   | 4.93E-05                | 6.36E-06   |
| <i>Delftia</i>         | 5.40E-08       | 5.40E-08   | 7.72E-05                | 9.51E-06   |
| <i>Desulfovibrio</i>   | 0.00033105     | 0.00011009 | 0.00061664              | 0.00017221 |
| <i>Dialister</i>       | 0.00190872     | 0.00069492 | 0.00139218              | 0.00023702 |
| <i>Dorea</i>           | 0.00293626     | 0.00042856 | 0.0004349               | 5.84E-05   |

|                              |            |            |            |            |
|------------------------------|------------|------------|------------|------------|
| <i>Eggerthella</i>           | 0.00095208 | 0.00053581 | 6.71E-05   | 1.96E-05   |
| <i>Enterobacter</i>          | 0.00249825 | 0.0010198  | 0.00426978 | 0.00017481 |
| <i>Enterococcus</i>          | 0.00178069 | 0.00130997 | 0.00045165 | 0.0001509  |
| <i>Escherichia</i>           | 0.05092025 | 0.0097853  | 5.49E-07   | 3.96E-07   |
| <i>Faecalibacterium</i>      | 0.11490269 | 0.00978819 | 0.00025102 | 2.25E-05   |
| <i>Finegoldia</i>            | 5.34E-06   | 4.89E-06   | 8.70E-06   | 1.76E-06   |
| <i>Fusobacterium</i>         | 0.00147211 | 0.00122664 | 0.00252811 | 0.00027304 |
| <i>Gardnerella</i>           | 2.31E-06   | 1.51E-06   | 1.48E-06   | 1.10E-06   |
| <i>Gemella</i>               | 2.54E-05   | 1.42E-05   | 8.18E-05   | 6.69E-06   |
| <i>Granulicatella</i>        | 2.74E-05   | 9.11E-06   | 0.00242879 | 0.00014535 |
| <i>Haemophilus</i>           | 0.00230483 | 0.00049083 | 0.01195307 | 0.00111646 |
| <i>Holdemania</i>            | 8.44E-05   | 2.01E-05   | 2.97E-05   | 7.72E-06   |
| <i>Klebsiella</i>            | 0.00652499 | 0.00277918 | 7.14E-07   | 2.66E-07   |
| <i>Kocuria</i>               | 6.89E-07   | 6.89E-07   | 7.25E-05   | 2.36E-05   |
| <i>Lactobacillus</i>         | 0.00222834 | 0.0014829  | 0.00025986 | 3.40E-05   |
| <i>Lactococcus</i>           | 3.20E-05   | 2.02E-05   | 1.07E-05   | 2.59E-06   |
| <i>Lautropia</i>             | 7.20E-08   | 4.14E-08   | 0.00165815 | 0.00012318 |
| <i>Leptotrichia</i>          | 9.00E-08   | 9.00E-08   | 0.00202201 | 0.00012525 |
| <i>Leuconostoc</i>           | 3.13E-05   | 1.76E-05   | 3.41E-05   | 1.51E-05   |
| <i>Macrococcus</i>           | 2.78E-06   | 2.78E-06   | 1.38E-06   | 3.84E-07   |
| <i>Megamonas</i>             | 0.01585212 | 0.00474073 | 0.00037145 | 5.20E-05   |
| <i>Megasphaera</i>           | 0.00093587 | 0.00037737 | 0.00054735 | 6.90E-05   |
| <i>Microcoleus</i>           | 4.48E-07   | 4.48E-07   | 1.09E-06   | 1.09E-06   |
| <i>Mitsuokella</i>           | 0.00139377 | 0.00092944 | 1.09E-06   | 3.51E-07   |
| <i>Morganella</i>            | 6.11E-07   | 4.31E-07   | 3.08E-06   | 1.75E-06   |
| <i>Mycobacterium</i>         | 1.45E-06   | 1.45E-06   | 3.06E-05   | 1.13E-05   |
| <i>Mycoplasma</i>            | 4.85E-07   | 4.85E-07   | 1.96E-07   | 1.38E-07   |
| <i>Neisseria</i>             | 1.12E-06   | 6.94E-07   | 0.02508268 | 0.00219087 |
| <i>Odoribacter</i>           | 0.00362157 | 0.00058102 | 1.90E-05   | 2.53E-06   |
| <i>Oribacterium</i>          | 1.65E-06   | 1.58E-06   | 0.00026302 | 1.99E-05   |
| <i>Oxalobacter</i>           | 1.01E-05   | 6.04E-06   | 1.94E-06   | 6.16E-07   |
| <i>Parabacteroides</i>       | 0.01438242 | 0.00176937 | 8.45E-05   | 1.22E-05   |
| <i>Paracoccus</i>            | 7.80E-08   | 7.80E-08   | 8.29E-05   | 3.01E-05   |
| <i>Paraprevotella</i>        | 0.00385868 | 0.00083775 | 2.84E-05   | 5.10E-06   |
| <i>Parvimonas</i>            | 8.92E-06   | 6.01E-06   | 6.81E-05   | 5.29E-06   |
| <i>Peptoniphilus</i>         | 3.14E-07   | 2.22E-07   | 1.91E-05   | 4.48E-06   |
| <i>Peptostreptococcus</i>    | 2.23E-05   | 1.10E-05   | 7.40E-05   | 1.47E-05   |
| <i>Phascolarctobacterium</i> | 0.0048501  | 0.00152055 | 0.0064638  | 0.00108653 |
| <i>Porphyromonas</i>         | 5.60E-05   | 3.65E-05   | 0.00725885 | 0.00051105 |
| <i>Prevotella</i>            | 0.17470022 | 0.0238075  | 0.01687759 | 0.00100036 |
| <i>Propionibacterium</i>     | 1.12E-05   | 1.03E-05   | 0.00076495 | 0.00015864 |
| <i>Proteus</i>               | 8.41E-06   | 6.20E-06   | 5.44E-07   | 2.81E-07   |
| <i>Providencia</i>           | 3.81E-07   | 3.81E-07   | 1.63E-06   | 6.24E-07   |



|                         |            |            |            |            |
|-------------------------|------------|------------|------------|------------|
| <i>Pseudomonas</i>      | 6.75E-06   | 3.10E-06   | 0.00115194 | 0.00016507 |
| <i>Pyramidobacter</i>   | 5.20E-05   | 3.63E-05   | 4.35E-05   | 9.16E-06   |
| <i>Roseburia</i>        | 0.02886248 | 0.0042608  | 0.00020924 | 5.07E-05   |
| <i>Rothia</i>           | 6.59E-05   | 1.62E-05   | 0.00228264 | 0.00017808 |
| <i>Ruminococcus</i>     | 0.02661598 | 0.00409609 | 0.00275781 | 0.00042481 |
| <i>Salmonella</i>       | 0.00036895 | 0.00036895 | 1.88E-06   | 4.73E-07   |
| <i>Scardovia</i>        | 2.02E-05   | 8.95E-06   | 1.04E-05   | 2.48E-06   |
| <i>Selenomonas</i>      | 2.51E-05   | 1.96E-05   | 0.00057192 | 6.05E-05   |
| <i>Shuttleworthia</i>   | 7.11E-07   | 4.44E-07   | 1.30E-05   | 1.39E-06   |
| <i>Staphylococcus</i>   | 1.04E-05   | 6.94E-06   | 8.93E-05   | 7.56E-06   |
| <i>Stenotrophomonas</i> | 1.13E-06   | 1.13E-06   | 2.81E-05   | 4.76E-06   |
| <i>Streptococcus</i>    | 0.0040409  | 0.00140639 | 0.01874711 | 0.00127545 |
| <i>Sutterella</i>       | 0.00180087 | 0.0006182  | 0.00180496 | 0.00035735 |
| <i>Turcibacter</i>      | 5.52E-05   | 2.04E-05   | 2.27E-05   | 4.44E-06   |
| <i>Veillonella</i>      | 0.00345126 | 0.00078786 | 0.00672211 | 0.00040338 |
| <i>Weissella</i>        | 0.00044631 | 0.00025918 | 5.45E-06   | 1.40E-06   |

The mean relative abundances and SEM of genera across all the samples from two datasets were calculated. SEM, standard error of the mean.

**Supplementary table 8** 16S rRNA gene sequencing of the isolated single colony from the joint synovial fluid of patients in the fourth stage of rheumatoid arthritis.

| Sample                  | Sequences                                                                                                                                                                                                                                                                                                                                                                                                                                                                                                                                                                                                                                                                                                                                                                                                                                                                                                                                                                                                                                                                                                                                                                                                                                                                                                                                                                                                                                                                                                                                                                                                                                                                                                                                                                                                                                                                                                                                                                                                                                                                                                                                                                                                                                                                               | Taxonomy                                                                                                                  |
|-------------------------|-----------------------------------------------------------------------------------------------------------------------------------------------------------------------------------------------------------------------------------------------------------------------------------------------------------------------------------------------------------------------------------------------------------------------------------------------------------------------------------------------------------------------------------------------------------------------------------------------------------------------------------------------------------------------------------------------------------------------------------------------------------------------------------------------------------------------------------------------------------------------------------------------------------------------------------------------------------------------------------------------------------------------------------------------------------------------------------------------------------------------------------------------------------------------------------------------------------------------------------------------------------------------------------------------------------------------------------------------------------------------------------------------------------------------------------------------------------------------------------------------------------------------------------------------------------------------------------------------------------------------------------------------------------------------------------------------------------------------------------------------------------------------------------------------------------------------------------------------------------------------------------------------------------------------------------------------------------------------------------------------------------------------------------------------------------------------------------------------------------------------------------------------------------------------------------------------------------------------------------------------------------------------------------------|---------------------------------------------------------------------------------------------------------------------------|
| SF1, SF3, SF4, SF8, SF9 | GCTGGCTCCTTACCGTTACCTCACGGACTTCGGGTGTACCAGCTCTCATGGTGTGACGGGGCGGTGTGACAAGGCCCG<br>GGAACGTATTACCGCCGACATTCTGATTCCGATTACTAGCAACTCCAGCTTCATGTAGCCGAGTTGCAGCCACAAATCCG<br>AACTGAGATAGGTTTTATAAGTTTTGCTCCACCTCACGGTCTTCCGCTCTATTGTACCTACCATTGTAGCACGTGTGAGCC<br>CTGGACATAAAGGGCATGATGATTGACGTCACTCCACCTCTCTCGTTACCCAGGAGCTCATTAGAGTGTCAAC<br>TTAATGGTAGCACTAATAACAAGGGTTGCGCTCGTTCAGGACTTAACCTAACATCTCACGACAGAGCTGACGACAACC<br>ATGCACACCTGTCTCCTTGCCTCCGAGGGCTTACCTATCTCTAGGCTATGCAAGGGATGTCAAGTCCAGGTAAGGTTT<br>TTCGCGTTGCTTCAAAATAAACACATGCTCCGCTGCTTGTGCGGGCCCCGCAATTCCTTTGAGTTTTAATCTTCCGAC<br>CGTACTCCCGAGCCGGGACTATTGTTAACTGCGGACAGGGGGAGTGTATCCCTTACACCTAGTATCCATCGT<br>TTACGGCTGGACTACCAGGGTATCTAATCCTGTTTGTACCCACGCTTTCGTCCTCAGCGTCAGTTACAGTCCAGAAAG<br>CCGCTTCCGCACTGGTGTCTTCTAATCTCTACGCAATTCACCGCTACACAGGAAATCCGCTTTCCTCTCCGCACT<br>CTAGATATCCAGTTTGAATGACGCCCCAGGTTAAGCCCGGGGATTCACATCCACTTAAACATCCGCCACGACCC<br>TTTACGCCAGTAAATCCGGACAACGCTCCGACCTACTGATTACCAGCGCTGCTGGCACGTAGTACCGCTGGCTTCTC<br>CTCTGTCACCGCTCATTTGCTCCAGAAACAGGGCTTACAATCCGAAGACTTCAACACCCAGCCGCGGTTCTGCG<br>TCAGGGTTTCCCCATTCGCAATATTCCTCCACTGCTGCCCTCCGAGGAGTCTGGACCGTGTCTCAGTTCCAATGTGCC<br>CGATCACCTCTCAGGTCGGCTACGCATCTGTTGCCCTTGGTAAGCGGTTACCTTACCAACTAGCTAATGCGCCGGGGTCC<br>ATCTCAAAGCAATAAATCTTTGATAAGAAAATCATGCGATTCTCTTATGTTATGCGGATTAATCTTCTTCCGGAAGGCTAT<br>CCCCCACTTTGAGGACAGGTTACCCACGCTTACTCACCCGCTCCGCCGCTAATCCACTTCCCGAAGGAAGCTTATCGCTC<br>GACTTGCATGTGTTAAGCACGCCGCCAGCGTTCGTCCTGAGCC                                                                                                                                                                                                                                                                                                                                                                                                                                                                                                                                                                                                                                                                                                                                                                                                      | 1. Clostridium sporogenes strain JCM 1416 (NR_113245.1);<br>2. Clostridium sporogenes strain McClung 2004 (NR_029231.1)   |
| SF2, SF6, SF7           | GGGGCTGCGCAGCTATACATGCAAGTGAACGCTTTTCTTTCCAGCGAGCTTGTCCACCAGAAAGAAAGAGTGGC<br>GAACGGGTGAGTAACAGCTGGGTAACTGCCATCAGAAGGGGATAACACTTGGAAACAGGTGCTAATACCGTATAACT<br>ATTTCCGATGGAAGAAAGTTGAAAGCGCTTTTGCCTCACTGATGGATGGACCCGCGGTGCTAATAGCTAGTGTGGTGGG<br>TAACGGCTCCAAAGGCCACGATGCATAGCCGACCTGAGAGGGTGAATCGGCCACACTGGGACTGAGACACGGCCAGAC<br>TCTACTGGGAGGACGAGTAGGGAATCTTGGCAATGGACGAAAGTCTGACCAGCAACGCCGCGTGAAGGAGGTT<br>TTCCGATCGTAAACTCTGTTGTTAGAGAAGAACAAGGATGAGAGTGAAGCTTATCCCTTGACGGTATCTAACAGAAAG<br>CCAGGGCTAACTAGTCCAGCAGCCGCGGTAATAGTGGTGGCAAGCGTTTCCGGATTTATGGGCGTAAAGCGAGC<br>GCAGCGGTTTCTTAAGTCTGATGAAAGCCCGCGCTCAACCGGGGAGGTCATTGGAACTGGGAGACTTGAAGTGA<br>GAAGGAGGAGTGAATCCATGTGTAGCGGTAAGTGCATAGATATAGGAGAACACAGTGGCAGGCGGCTCTCTG<br>GTCTGTAACGACGCTGAGGCTCGAAAGCGTGGGAGCGAACAGGATAGATACCTGGTAGTCCACGCCGTAACGATG<br>AGTGCTAAGTGTGGAGGGTTCCGCCCTTACGTGCTGACAGCAACGCATTAAAGCACTCCGCCCTGGGAGTACGACCGCA<br>AGTTGAAACTAAAGGAATGACGGGGGCCCGCAACAGCGGTGGAGCATGTGGTTAATTCGAAGCAACCGGAAGACT<br>TACCAGGCTTGACATCCTTTGACCACTTAGAGATAGAGCTTCCCTTCCGGGGCAAGGTGACAGGTGGTGCATGGTTGT<br>CGTCAGCTGTGTCGTGAGATGTTGGGTTAAGTCCCGCAACGAGCGCAACCCCTTATTGTTAGTGGCATTTAGTGTGG<br>CACTCTAGCGAGACTGCCGGTGAACAACCGGAGGAGGTGGGATGACGTCAAACTCATGCCCTTATGACCTGGGCT<br>ACACACGTGCTACAATGGGAAGTACAACGAGTTCGCAAGTCCGCGAGGCTAAGCTAATCTTAAAGCTTCTCTCAGTTCGG<br>ATTTGAGGCTCAACTCGCTACATGAAGCCGGAATCGCTAGTAACTGCGGGATCAGCAACGCCGCGGTGAATACGTTCCG<br>GGCTTGTACACACCGCCGCTACACACAGGAGTGTGTAACACCGAAGTCCGGTGAAGTAACTTTTGGAGCCAGCCGC<br>CTAAGTGGAAAGGAAGT                                                                                                                                                                                                                                                                                                                                                                                                                                                                                                                                                                                                                                                                                                                                                                  | 1. Enterococcus gallinarum strain NBRC 100675 (NR_113924.1);<br>2. Enterococcus gallinarum strain LMG 13129 (NR_104559.2) |
| SF5                     | GGGGCTGCGCGGCTACACTGCAGTGAACGCTTTTCTTCCAGCTTGTCTGCTGTGACGAGTGGCGGATGGTGAAT<br>AGTGTATGGGAACTGCCCGATGGAAGGGGATACCTACTGGACAGGAGTAACTACCGCATAACGCTTGGACATTATG<br>GGGACCTTCCGGGCTCTTGCATCCGATCGGTGCTATGGGATATGGACCAGGTTGGGTAACGGCTACCTAGGCGAC<br>GATCCCTAGATGGTCTGAATGATGACAGCCATGCTGGGCTATCACACCCAGGACTCCAGCGGGAGGCGACGACTGG<br>GGAATATGGCACGATGGGGCAAGCCTGATGACGCACTGCGGGTGTATGAAGAAGGCTTCTGGTTGAAAGTGTITCA<br>GCGAGGATGAGGTGTGTGGTTAATAACCAAGGAAATGACGTTACTGCTCCCTGACACCGGCTAACTCCGTGCAACG<br>GCCGCTACATACGGAGGGTGAAGCGTAACTGCAAGTACTGCGCTAAAGGACAATGGGGTGTGTCAAGTCCGGATGT<br>GAAATTCGGGGATACCTGGGAATGCATCCGAAACTGGAGGGCTTGTCTGTGGAGGACGTAGAATCCAGGTGTA<br>CGGTAATTTGGGAGAGATCTGGAGGAATACCGATGCGGAAGGAGCCCTCCGGACAAAGACTGACCCCTCAGTGCTAA<br>CTCATGCTGAGCCAGGATAGATACCTGATAGTACACGCCGTACACGATGTCACCTTGCAGGTTGAGCACTTGAAGC<br>GTGGCTACGGGAGCTAACCGCTTGTGACGACTGGAGAGTACCGCCGCGAGGGTAAACTCAATGAATGACGGGTC<br>TACAAGCGGGGAGCATGTGTTACATTTGATGATCGGCTAGAACTTACTACTCTGACATCCCATCAGGTTTCTAGA<br>ATTCCTTGGCGGCTGCGGGAAGCTCTATACAGTGGGGACAGATGACGAGGGTCCATGTGTGACTTAAGAGGCAAGTCA<br>GCCAACCTTGAAGTGAAGCTGTGCAACTCTACGAGCAGCAGTGGCATCCTGCCATGACGACAGTCTGACTGCAAGC<br>ATGACGCTGATTGACAGGCAATCAGATGTAAGTACGTCATCGAGAGAGCTGATCGTCTGATTATAGCAGCTGCCAC<br>TGACGTAAGTACGAGAAAGCACCGGCTAACTACCCTGCCAGCAGCCGCTAATACGGAGGGGTGCAAGCGTGAATC<br>GGAAATTTGGGCGTAAAGCGACACGAGCGGCTGTCAAGTCCGATGTGAAATCCCGGGCTCAACCGTGGAGGGT<br>GCATCTGAAACTGGCAGACTTAAAGTCTGATGGAGGAGAGATGGGAATTCATGTGTAGCGGGTGAATAATGCGTGA<br>TGAAGGAAACACAGTGGGCGAAGGGCGGGTCTTGGTACATAGACTGACGCTTCCGGCTCGAAAGCGTGGGGAAAGC<br>AAACACGGATAGATACCCCTGTATTCCCGCCGTAACGGATGTCGACATGGAGTGGTGGGCTTCCACTGTGGCTT<br>CCGGAGCTAACGCATTAAAGTCACTCCGCCCTGGGGAGTACGGCCGCAAGGTTAAACTCAAAGGAATGACGGGGGCC<br>GCACAAGCGGTGGAGCATGTGGTTAATTCATGATCAACGCAAGAACCTTACCCTTGTGACATCCAGAGACTAGCAGAG<br>ATAGAGCTTTCTTCCGGAACCAAGGACAGGGTGGGATGCGGGTTTCTCATCGTGTGTTGAAATGTTGATTTGCTC<br>GCACCGAGAGCACCCCTTATCCTTAGTGCCATCATTGGTGGCAACTCAAAGGAGACTCCAGGGCTAACTGGAGGAA<br>GGTGGGATGACGTCAAGTCAATGAGGCTTACGAGTAGGGCTCCACAGCTGTTCCAAATGGAAGATCAAAGAGAAAGCA<br>CCCCGGGAGTCAAAGCAATCTTAAGCTTCTTCAATTCGGATGACAGGTTGCAAAATGCTTCCATGAAGCTGAAATC<br>GTTAGTAATGGGGATCGCACGCCCGGTAAGTGTTCGGGCTTTACCCCGCCCGCTCACACCGAGAAATGGAA<br>CCCAAGAAAGTTGGGAGGTAAACGTAAGGAGCCAGCTCCTAAGTGAACGTTG | 1. Citrobacter freundii strain LMG 3246 (NR_117752.1);<br>2. Citrobacter freundii strain JCM 1657 (NR_113340.1)           |

**Supplementary table 9** QC metrics of metagenomic sequences.

| Filename | Read count | base count | Q20 (%) | Q30 (%) | GC content (%) |
|----------|------------|------------|---------|---------|----------------|
| HF16     | 45426814   | 6814022100 | 94.53   | 86.89   | 42.7           |
| HF17     | 42464234   | 6369635100 | 96.79   | 91.31   | 44.75          |
| HF18     | 41901214   | 6285182100 | 97.05   | 91.95   | 44.22          |
| HF20     | 43980332   | 6597049800 | 94.36   | 86.63   | 45.49          |
| HF21     | 44239462   | 6635919300 | 95.31   | 88.27   | 43.22          |
| HF22     | 42648660   | 6397299000 | 96.68   | 91.15   | 45.89          |
| HF25     | 41728154   | 6259223100 | 96.86   | 91.55   | 46.14          |
| HF28     | 42442994   | 6366449100 | 97.02   | 91.77   | 43.74          |
| HF31     | 48715360   | 7307304000 | 95.06   | 87.98   | 43.67          |
| HF32     | 42228228   | 6334234200 | 95      | 87.81   | 46.25          |
| HF33     | 43057824   | 6458673600 | 94.84   | 87.53   | 46.94          |
| HF36     | 45431934   | 6814790100 | 97.71   | 93.31   | 44             |
| HF37     | 45420844   | 6813126600 | 95.15   | 88.03   | 45.22          |
| HF38     | 44381380   | 6657207000 | 94.3    | 86.56   | 45.06          |
| HF39     | 41799946   | 6269991900 | 95.06   | 87.91   | 45.36          |
| HF3      | 42678234   | 6401735100 | 95.19   | 88.11   | 44.44          |
| HF41     | 46132006   | 6919800900 | 94.57   | 86.98   | 45.28          |
| HF43     | 41788168   | 6268225200 | 94.44   | 86.81   | 48.96          |
| HF44     | 45101768   | 6765265200 | 95.25   | 88.22   | 44.22          |
| HF46     | 44819996   | 6722999400 | 95.03   | 87.8    | 45.08          |
| HF49     | 42261648   | 6339247200 | 96.6    | 90.94   | 43.89          |
| HF4      | 46476802   | 6971520300 | 94      | 85.75   | 45.38          |
| HF51     | 41250820   | 6187623000 | 96.8    | 91.38   | 46.22          |
| HF5      | 39758590   | 5963788500 | 94.5    | 86.82   | 42.44          |
| HF7      | 49212934   | 7381940100 | 94.45   | 86.79   | 47.59          |
| HF8      | 40649274   | 6097391100 | 94.66   | 87.15   | 44.74          |
| HF9      | 42372194   | 6355829100 | 95.95   | 89.4    | 44.47          |
| OAF33    | 44103910   | 6615586500 | 96.8    | 91.37   | 45.05          |
| OAF39    | 41028814   | 6154322100 | 94.72   | 87.25   | 44.02          |
| OAF40    | 42711768   | 6406765200 | 97.15   | 92.08   | 45.99          |
| OAF41    | 41925700   | 6288855000 | 93.81   | 86.2    | 42.91          |
| OAF43    | 41294354   | 6194153100 | 95.66   | 89.14   | 45.54          |
| OAF44    | 39774718   | 5966207700 | 95.3    | 88.37   | 46.97          |
| OAF45    | 40516468   | 6077470200 | 97      | 92.2    | 50.55          |
| OAF46    | 42165434   | 6324815100 | 94.98   | 87.84   | 43.3           |
| OAF49    | 43398242   | 6509736300 | 97.93   | 93.94   | 50.6           |
| OAF53    | 45107442   | 6766116300 | 95.37   | 88.45   | 44.84          |
| OAF54    | 43498328   | 6524749200 | 97.48   | 92.92   | 49.78          |
| OAF63    | 44173628   | 6626044200 | 97.1    | 91.96   | 43.53          |
| OAF66    | 42944028   | 6441604200 | 95.2    | 88.13   | 45.17          |
| OAF68    | 45564888   | 6834733200 | 94.92   | 87.69   | 44.96          |
| OAF69    | 45345760   | 6801864000 | 97.3    | 92.39   | 43.26          |

|        |          |            |       |       |       |
|--------|----------|------------|-------|-------|-------|
| OAF70  | 41783728 | 6267559200 | 95.09 | 87.96 | 49.05 |
| OAF74  | 40480268 | 6072040200 | 96.83 | 91.43 | 45.73 |
| OAF77  | 43064918 | 6459737700 | 96.63 | 91.04 | 44.71 |
| OAF79  | 40788874 | 6118331100 | 95.95 | 89.4  | 44.3  |
| RAF101 | 43034368 | 6455155200 | 94.58 | 87.17 | 46.85 |
| RAF102 | 43178154 | 6476723100 | 97.11 | 92.14 | 52.33 |
| RAF104 | 41053400 | 6158010000 | 94.89 | 87.69 | 44.34 |
| RAF106 | 44211600 | 6631740000 | 96.72 | 91.26 | 46.36 |
| RAF107 | 45474716 | 6821207400 | 95.69 | 89.16 | 48.41 |
| RAF111 | 41272668 | 6190900200 | 96.8  | 91.38 | 45.73 |
| RAF112 | 44410128 | 6661519200 | 96.59 | 91.06 | 49.55 |
| RAF113 | 41958710 | 6293806500 | 94.96 | 87.7  | 45.23 |
| RAF116 | 41167720 | 6175158000 | 96.51 | 90.84 | 45.02 |
| RAF117 | 40297500 | 6044625000 | 94.44 | 86.77 | 42.93 |
| RAF118 | 41616114 | 6242417100 | 94.98 | 87.65 | 42.66 |
| RAF120 | 46528830 | 6979324500 | 92.37 | 83.39 | 44.37 |
| RAF122 | 42132620 | 6319893000 | 96.55 | 91.12 | 50.61 |
| RAF123 | 43624680 | 6543702000 | 97.13 | 91.93 | 41.14 |
| RAF124 | 44983948 | 6747592200 | 96.78 | 91.36 | 46.38 |
| RAF125 | 40346302 | 6051945300 | 95.24 | 88.14 | 41.47 |
| RAF126 | 42991048 | 6448657200 | 96.87 | 91.56 | 46.75 |
| RAF127 | 40315134 | 6047270100 | 94.66 | 87.16 | 43.78 |
| RAF128 | 44285618 | 6642842700 | 94.86 | 87.62 | 44.91 |
| RAF129 | 40564390 | 6084658500 | 97.19 | 92.25 | 46.88 |
| RAF131 | 41919100 | 6287865000 | 96.95 | 91.86 | 52.05 |
| RAF132 | 41020208 | 6153031200 | 96.77 | 91.34 | 46.2  |
| RAF135 | 40542788 | 6081418200 | 95.38 | 88.65 | 48.34 |
| RAF137 | 43476654 | 6521498100 | 95.41 | 88.6  | 45.38 |
| RAF138 | 43774724 | 6566208600 | 97.05 | 91.92 | 46.46 |
| RAF139 | 41291580 | 6193737000 | 95.31 | 88.38 | 43.58 |
| RAF140 | 45914110 | 6887116500 | 95.3  | 88.54 | 51.92 |
| RAF141 | 47544378 | 7131656700 | 94.28 | 86.53 | 43.34 |
| RAF142 | 45594532 | 6839179800 | 94.63 | 87.12 | 44.94 |
| RAF143 | 42483748 | 6372562200 | 94.87 | 87.55 | 42.98 |
| RAF146 | 47249506 | 7087425900 | 94.98 | 87.74 | 44.97 |
| RAF147 | 40224094 | 6033614100 | 97.17 | 92.18 | 47.36 |
| RAF149 | 45841894 | 6876284100 | 97.61 | 93.08 | 43.89 |
| RAF150 | 40316734 | 6047510100 | 97.12 | 92.07 | 45.59 |
| RAF151 | 45314032 | 6797104800 | 94.75 | 87.32 | 44.55 |
| RAF153 | 40635770 | 6095365500 | 95.55 | 88.88 | 45.11 |
| RAF158 | 40476348 | 6071452200 | 96.66 | 91.15 | 47.72 |
| RAF159 | 40627908 | 6094186200 | 96.5  | 90.82 | 47.55 |
| RAF160 | 42544754 | 6381713100 | 95.23 | 88.27 | 45.51 |
| RAF161 | 41397638 | 6209645700 | 96.42 | 90.7  | 49.47 |

|        |          |            |       |       |       |
|--------|----------|------------|-------|-------|-------|
| RAF166 | 41874280 | 6281142000 | 97.42 | 92.59 | 45.65 |
| RAF167 | 41896240 | 6284436000 | 97.13 | 92.03 | 44.47 |
| RAF170 | 43880640 | 6582096000 | 96.65 | 91.07 | 45.8  |
| RAF174 | 43765520 | 6564828000 | 96.74 | 91.28 | 47.36 |
| RAF177 | 42902240 | 6435336000 | 97.5  | 92.83 | 43.69 |
| RAF179 | 41915000 | 6287250000 | 97.18 | 92.15 | 45.03 |
| RAF180 | 44576348 | 6686452200 | 97.07 | 91.93 | 44.21 |
| RAF184 | 44365800 | 6654870000 | 97.25 | 92.34 | 46.2  |
| RAF185 | 43686968 | 6553045200 | 97.25 | 92.31 | 45.5  |
| RAF186 | 44277220 | 6641583000 | 97.63 | 93.16 | 45.45 |
| RAF187 | 40748474 | 6112271100 | 96.78 | 91.38 | 45.67 |
| RAF25  | 43019142 | 6452871300 | 97.05 | 91.86 | 45.33 |
| RAF44  | 43568814 | 6535322100 | 97.2  | 92.27 | 48.01 |
| RAF58  | 41975628 | 6296344200 | 96.45 | 90.84 | 45.49 |
| RAF61  | 42669114 | 6400367100 | 94.89 | 87.63 | 44.57 |
| RAF63  | 40123452 | 6018517800 | 96.81 | 91.39 | 44.33 |
| RAF66  | 44098600 | 6614790000 | 96.66 | 91.14 | 47.41 |
| RAF68  | 44615320 | 6692298000 | 97.13 | 91.94 | 44.86 |
| RAF70  | 43380268 | 6507040200 | 94.63 | 87.09 | 44.51 |
| RAF71  | 44516994 | 6677549100 | 97.5  | 92.91 | 46.35 |
| RAF74  | 41052480 | 6157872000 | 96.97 | 91.8  | 49.8  |
| RAF75  | 44768028 | 6715204200 | 97.35 | 92.5  | 43.84 |
| RAF77  | 42776628 | 6416494200 | 97.42 | 92.88 | 46.89 |
| RAF78  | 40979382 | 6146907300 | 95    | 87.75 | 45.33 |
| RAF79  | 43642800 | 6546420000 | 95.55 | 88.85 | 43.52 |
| RAF80  | 45535296 | 6830294400 | 97.05 | 91.81 | 42.02 |
| RAF81  | 46449788 | 6967468200 | 93.88 | 85.57 | 46.78 |
| RAF84  | 43913220 | 6586983000 | 97.4  | 92.69 | 47.39 |
| RAF86  | 41103940 | 6165591000 | 96.89 | 91.62 | 50.15 |
| RAF87  | 42285100 | 6342765000 | 96.09 | 90.61 | 47.07 |
| RAF88  | 47400690 | 7110103500 | 94.73 | 87.45 | 45.66 |
| RAF89  | 40617160 | 6092574000 | 94.8  | 87.4  | 44.51 |
| RAF90  | 47154162 | 7073124300 | 95.16 | 88.03 | 45.3  |
| RAF92  | 40483234 | 6072485100 | 96.84 | 91.4  | 45.42 |
| RAF95  | 42641890 | 6396283500 | 94.38 | 86.66 | 45.22 |
| RAF96  | 44305868 | 6645880200 | 97.12 | 92.02 | 43.39 |

QC, quality control

Q20, percentages of bases whose correct base recognition rates are greater than 99% in total bases.

Q30, percentages of bases whose correct base recognition rates are greater than 99.9% in total bases.

GC content: (G & C base count) / (Total base count)
